# Supplementary material for: Modelling the Extraction of Pectin towards the Valorisation of Watermelon Rind Waste
Source: PubMed Central journal article supplement (PMC8066451; doi:10.3390/foods10040738), 2021-03-31
Supplement: foods-10-00738-s001.pdf [file foods-10-00738-s001.pdf]

## Supplementary Material

### **Modelling the extraction of pectin towards the valorisation of watermelon rind waste**

**Daniel Alexander Mendez<sup>1</sup>, María José Fabra<sup>1,2</sup>, Laura Gómez. Gómez-Mascaraque<sup>3</sup>, Amparo López-Rubio<sup>1,2</sup>, Antonio Martínez-Abad<sup>1,2\*</sup>**

<sup>1</sup> Food Safety and Preservation Department, Institute of Agrochemistry and Food Technology (IATA-CSIC), Valencia, Spain

<sup>2</sup> Interdisciplinary Platform for Sustainable Plastics towards a Circular Economy-Spanish National Research Council (SusPlast-CSIC), Madrid, Spain

<sup>3</sup> Department of Food Chemistry & Technology, Teagasc Food Research Centre, Moorepark, Fermoy, Co. Cork, Ireland

\*Corresponding author: Antonio Martínez-Abad. E-mail address: [conaba@iata.csic.es](mailto:conaba@iata.csic.es)

Tel.: +34 963900022; fax: +34 963636301

**Table S1.** Polynomial equations obtained for the prediction of responses properties for pectin extracted.

|                                                                                                                                           |        |
|-------------------------------------------------------------------------------------------------------------------------------------------|--------|
| $Y(\%)=8.81 - 0.24816X_1 - 0.11X_2 + 9.51X_3 + 0.002X_1^2 + 0.0005X_1X_2 - 0.013X_1X_3 + 0.0009X_2^2 - 0.011X_2X_3 - 2.68X_3^2$           | Eq. 1  |
| $DE(\%)=-29.90 + 2.56X_1 - 0.083X_2 - 3.16X_3 - 0.021X_1^2 + 0.0006X_1X_2 + 0.404X_1X_3 - 0.00060X_2^2 + 0.048X_2X_3 - 4.95X_3^2$         | Eq. 2  |
| $MeO(\%)=-19.99 + 0.68X_1 + 0.016X_2 - 1.32X_3 - 0.0047X_1^2 - 0.00008X_1X_2 + 0.068X_1X_3 - 0.00020X_2^2 + 0.0075X_2X_3 - 1.23X_3^2$     | Eq. 3  |
| $AUA(\%)=-92.90 + 3.86X_1 + 0.07X_2 - 11.51X_3 - 0.02X_1^2 - 0.0010X_1X_2 + 0.13X_1X_3 - 0.0004X_2^2 + 0.043X_2X_3 - 3.26X_3^2$           | Eq. 4  |
| $MM (kDa)=-23579.3 + 582.54X_1 + 106.43X_2 + 2300.88X_3 - 3.86X_1^2 - 0.86 X_1X_2 + 16.65X_1X_3 - 0.35X_2^2 - 0.54X_2X_3 - 921.90X_3^2$   | Eq. 5  |
| $GalA (\mu g/mg)=-362 + 17.3X_1 - 3.53X_2 - 27 X_3 - 0.047 X_1^2 + 0.0155 X_2^2 + 6.2 X_3^2 + 0.0073 X_1X_2 - 1.78 X_1X_3 + 0.707 X_2X_3$ | Eq. 6  |
| $Ara (\mu g/mg)= -162.3+2.76 X_1 +0.352X_2 +80.62X_3-0.0158 X_1^2 +0.0004X_1X_2 -0.40 X_1X_3 - 0.0035 X_2^2 -0.025X_2X_3 -6.32X_3^2$      | Eq. 7  |
| $Xyl (\mu g/mg)=-28.6+ 0.671X_1 - 0.1049X_2 +5.91X_3 -0.003X_1^2 +0.0015X_1X_2 -0.09X_1X_3+0.000013 X_2^2 -0.015X_2X_3 +1.10X_3^2$        | Eq. 8  |
| $Rha (\mu g/mg)= -53.0 + 1.49X_1 - 0.004X_2 + 6.64X_3 - 0.0063X_1^2 - 0.0010X_1X_2 -0.083X_1X_3 + 0.00067X_2^2 + 0.0172X_2X_3 -1.91X_3^2$ | Eq. 9  |
| $Gal (\mu g/mg) = -303 +15.5X_1 +2.64X_2 -203X_3 -0.10X_1^2 + 0.0024 X_2^2 -5.3X_3^2 - 0.040X_1X_2 +1.88 X_1X_3 +0.31X_2X_3$              | Eq. 10 |

**Table S2.** Composition ratios and pectin region % based on the mg/mg sample quantifiable neutral sugars and galacturonic acid (Denman & Morris, 2015)

| Run | RB <sup>a</sup> | RL <sup>b</sup> | RS <sup>c</sup> | HG % <sup>d</sup> | RG-I % <sup>e</sup> | HG:RG-I |
|-----|-----------------|-----------------|-----------------|-------------------|---------------------|---------|
| 1   | 16.39           | 1.30            | 39.34           | 34.20             | 25.79               | 1.32    |
| 2   | 12.29           | 1.91            | 19.69           | 42.47             | 21.37               | 1.98    |
| 3   | 11.62           | 1.60            | 10.76           | 32.23             | 19.42               | 1.66    |
| 4   | 21.52           | 1.47            | 5.37            | 24.66             | 16.04               | 1.53    |
| 5   | 5.64            | 3.71            | -               | 59.11             | 13.95               | 4.23    |
| 6   | 32.01           | 1.04            | 3.33            | 19.40             | 18.17               | 1.06    |
| 7   | 10.85           | 1.84            | 91.45           | 49.86             | 25.84               | 1.92    |
| 8   | 13.11           | 2.46            | 12.13           | 35.84             | 13.70               | 2.61    |
| 9   | 11.56           | 1.86            | 24.19           | 43.21             | 22.27               | 1.94    |
| 10  | 9.30            | 2.17            | 304.89          | 49.43             | 21.39               | 2.31    |
| 11  | 9.52            | 2.41            | 9.05            | 32.75             | 12.63               | 2.59    |
| 12  | 17.09           | 2.08            | 8.61            | 32.50             | 14.88               | 2.18    |
| 13  | 12.25           | 1.65            | 13.19           | 40.95             | 23.40               | 1.75    |
| 14  | 12.72           | 1.63            | 11.38           | 35.32             | 20.48               | 1.72    |
| 15  | 12.70           | 1.72            | 10.80           | 34.73             | 19.03               | 1.82    |
| OP* | 9.78            | 2.37            | 238.86          | 51.91             | 20.76               | 2.50    |
| AP  | 2.80            | 4.39            | 26.09           | 45.77             | 6.84                | 6.69    |
| CP  | 2.45            | 6.98            | 29.08           | 54.36             | 5.50                | 9.86    |

\*Pectin extracted at optimum yield conditions

<sup>a</sup> A larger value is indicative of larger average size of the branching side chains. (Gal+Ara/Rha).

<sup>b</sup> A larger value suggests of more linear/less branched pectins. (GalA/(Xyl+Rha+Ara+Gal)).

<sup>c</sup> A larger value is indicative of more severe extraction conditions and loss of arabinofuranosyl (Araf) residues. (GalA/Ara).

<sup>d</sup> (GalA-Rha).

<sup>e</sup> (2Rha+Ara+Gal).

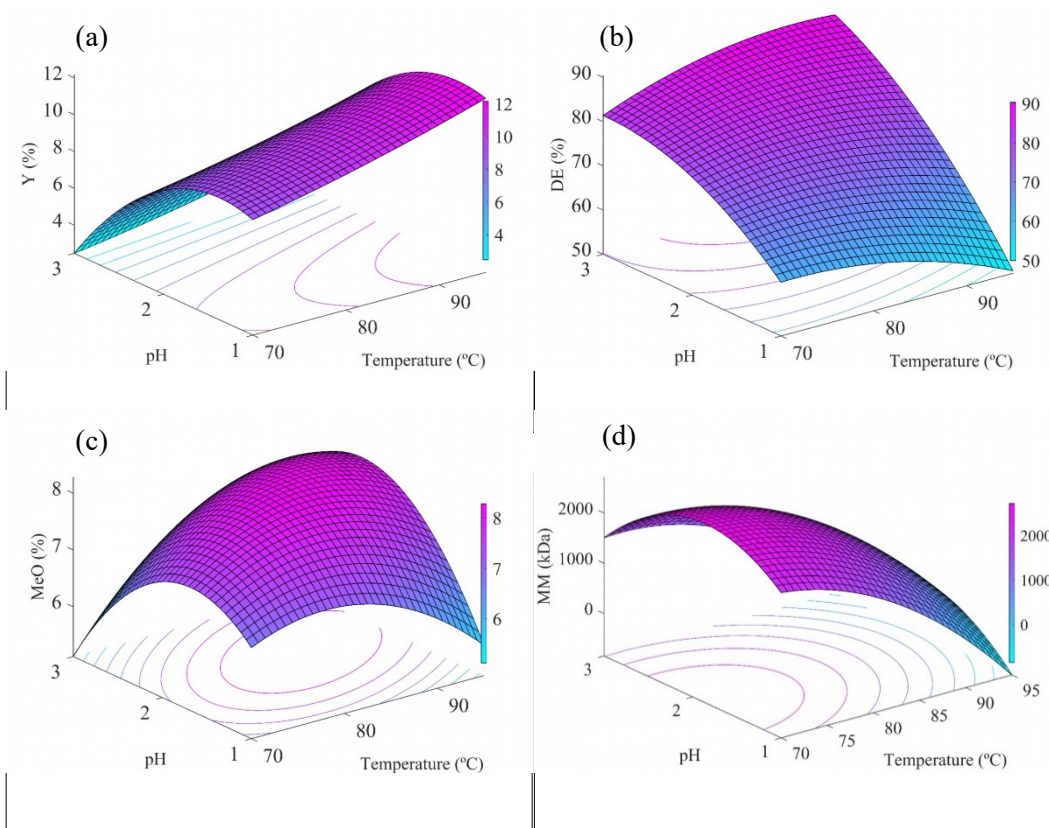

**Figure S1.** Response surface plot for the effects of temperature and pH with fixed time at 90 min on (a) yield (Y), (b) degree of esterification (DE), (c) methoxy content (MeO) and (d) molar mass (MM) (kDa), of pectin extracted.

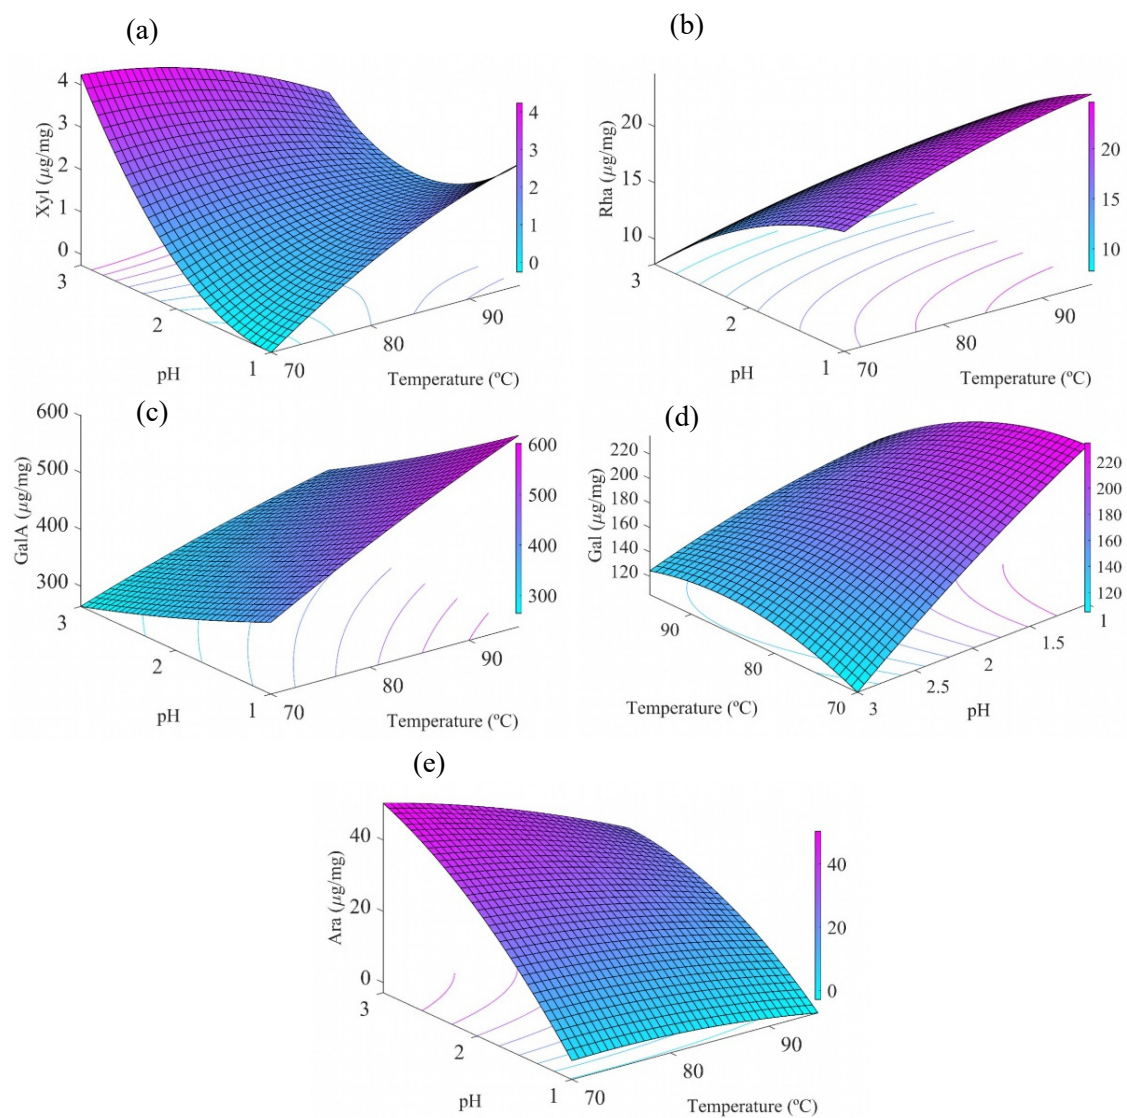

**Figure S2.** Response surface plot for the effects of temperature and pH with fixed time at 90 min on (a) xylose (Xyl), (b) rhamnose (Rha), (c) galacturonic acid (GalA), (d) galactose (Gal) and (e) arabinose (Ara) ( $\mu\text{g/mg}$ ) content of pectin extracted.

**Table S3.** Molar mass (MM) at distinctive highest point, peak area and polydispersity index estimated with mathematical deconvolution calculated from the HPSEC runs evaluated.

| Run       | Peak 1          |          |     | Peak 2       |          |     | Peak 3      |           |     |
|-----------|-----------------|----------|-----|--------------|----------|-----|-------------|-----------|-----|
|           | MM (kDa)        | Area %   | PDI | MM (kDa)     | Area %   | PDI | MM (kDa)    | Area %    | PDI |
| <b>1</b>  | 2348.4 ±65.24   | 64 ±2.8  | 8.5 | 19.94 ±0.42  | 36 ±2.8  | 1.6 | 0 ±0        | 0 ±0      | 0.0 |
| <b>2</b>  | 1376.78 ±76.47  | 77 ±4.1  | 2.9 | 43.80 ±1.95  | 19 ±4.1  | 1.1 | 5.94 ±0.17  | 3.7 ±0.2  | 1.6 |
| <b>3</b>  | 2687.38 ±77.45  | 75 ±0.3  | 1.8 | 59.90 ±1.51  | 21 ±0.1  | 2.6 | 5.54 ±0.22  | 4.2 ±0.3  | 1.0 |
| <b>4</b>  | 1665.9 ±100.85  | 50 ±1.6  | 2.7 | 58.51 ±0.88  | 28 ±0.7  | 1.4 | 4.15 ±0.03  | 22.2 ±2   | 1.1 |
| <b>5</b>  | 87.47 ±0.85     | 87 ±0.8  | 4.0 | 12.02 ±0.04  | 13 ±0.8  | 1.0 | 12.02 ±0.04 | 12.7 ±0.8 | 0.0 |
| <b>6</b>  | 1708.41 ±44.34  | 29 ±1.8  | 2.9 | 58.83 ±0.15  | 37 ±2.7  | 1.5 | 5.48 ±0.02  | 33.7 ±1   | 1.0 |
| <b>7</b>  | 1591.16 ±47.53  | 83 ±14.5 | 1.3 | 16.21 ±0.34  | 25 ±0    | 5.3 | 0 ±0        | 0 ±0      | 1.1 |
| <b>8</b>  | 280 ±61.25      | 55 ±4.2  | 2.6 | 74.76 ±1.35  | 33 ±2.9  | 1.8 | 5.21 ±0.18  | 11.4 ±1.8 | 1.0 |
| <b>9</b>  | 223.6 ±16.53    | 76 ±2.2  | 5.1 | 45.12 ±12.40 | 20 ±2.3  | 1.2 | 5.63 ±0.1   | 3.2 ±0.1  | 1.5 |
| <b>10</b> | 1148.72 ±114.91 | 7 ±11.4  | 1.8 | 198.79 ±4.47 | 73 ±11.3 | 4.0 | 14.22 ±0.11 | 20.5 ±0.3 | 1.1 |
| <b>11</b> | 2549 ±71.05     | 68 ±0.3  | 1.9 | 66.42 ±2.42  | 15 ±0.1  | 6.3 | 5.75 ±0.04  | 16.2 ±0.2 | 1.0 |
| <b>12</b> | 1157.93 ±65.51  | 58 ±0.8  | 2.9 | 63.31 ±1.28  | 27 ±0.6  | 1.7 | 4.94 ±0.07  | 15 ±0.8   | 1.0 |
| <b>13</b> | 2457.1 ±53.58   | 76 ±0.6  | 2.2 | 52.36 ±3.12  | 20 ±0.6  | 1.9 | 5.68 ±0.11  | 4.6 ±0.1  | 1.0 |
| <b>14</b> | 2678.84 ±66.55  | 78 ±0.3  | 1.9 | 55.52 ±2.15  | 22 ±0.3  | 9.5 | 0 ±0        | 0 ±0      | 1.0 |
| <b>15</b> | 2758.71 ±82.56  | 77 ±0.1  | 2.3 | 59.56 ±3.80  | 18 ±0.3  | 1.3 | 5.22 ±0.05  | 5 ±0.1    | 1.3 |
| OP*       | 106.11 ±2.70    | 79 ±0.3  | 6.1 | 13.11 ±0.11  | 21 ±0.3  | 1.0 | 0 ±0        | 0 ±0      | 0.0 |
| AP        | 339.4 ±11.4     | 100 ±0   | 8.9 | 0 ±0         | 0 ±0     | 0.0 | 0 ±0        | 0 ±0      | 0.0 |
| CP        | 77.84 ±3.80     | 100 ±0   | 2.0 | 0 ±0         | 0 ±0     | 0.0 | 0 ±0        | 0 ±0      | 0.0 |

\*Pectin extracted at optimum yield parameters (temp. 95 °C, pH 1.35 and time 90 min)

**Table S4.** Comparison of experimental and predicted values of three additional representative extractions, varying parameters and their respective responses.

| Responses    | 70°C, 60 min, pH 1 (1) |             | 82.5°C, 30 min, pH 3 (4) |             | 82.5°C, 60 min, pH 2 (14) |             |
|--------------|------------------------|-------------|--------------------------|-------------|---------------------------|-------------|
|              | Experimental value     | Model value | Experimental value       | Model value | Experimental value        | Model value |
| Y (%)        | 6.88                   | 6.89        | 2.45                     | 2.98        | 8.04                      | 8.15        |
| DE (%)       | 65.47                  | 64.63       | 87.28                    | 86.55       | 80.88                     | 80.08       |
| MeO (%)      | 6.87                   | 7.10        | 6.66                     | 6.58        | 9.00                      | 8.43        |
| AUA (%)      | 59.54                  | 61.7325     | 43.22                    | 43.05       | 63.16                     | 59.78       |
| MM (kDa)     | 2348.4                 | 2275.30     | 1665.90                  | 1607.56     | 2678.84                   | 2631.55     |
| GalA (µg/mg) | 357.72                 | 394.35      | 254.07                   | 267.31      | 386.74                    | 361.95      |
| Ara (µg/mg)  | 9.09                   | 7.68        | 47.31                    | 47.72       | 32.82                     | 33.64       |
| Fuc (µg/mg)  | 3.44                   | 3.23        | 2.93                     | 2.79        | 3.54                      | 3.37        |
| Gal (µg/mg)  | 248.49                 | 224.27      | 113.02                   | 105.01      | 176.57                    | 174.96      |
| Xyl (µg/mg)  | 0                      | 0.28        | 4.75                     | 5.04        | 1.52                      | 2.00        |
| Rha (µg/mg)  | 15.71                  | 17.37       | 7.45                     | 7.62        | 16.70                     | 17.02       |

## References

Denman, L. J., & Morris, G. A. (2015). An experimental design approach to the chemical characterisation of pectin polysaccharides extracted from *Cucumis melo Inodorus*. *Carbohydrate Polymers*, *117*, 364–369. <https://doi.org/10.1016/j.carbpol.2014.09.081>
